# Supplementary material for: A Genome-Wide Screen Identifies Genes in Rhizosphere-Associated Pseudomonas Required to Evade Plant Defenses
Source: PubMed Central journal article supplement (PMC6222131; doi:10.1128/mbio.00433-18), 2018-11-06

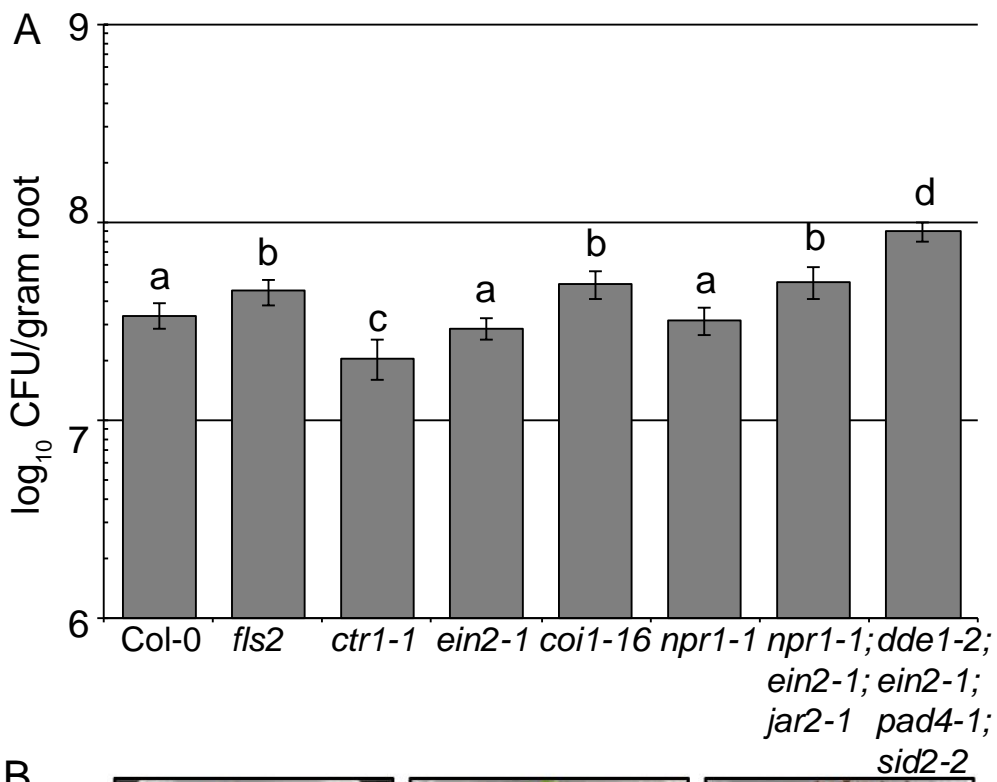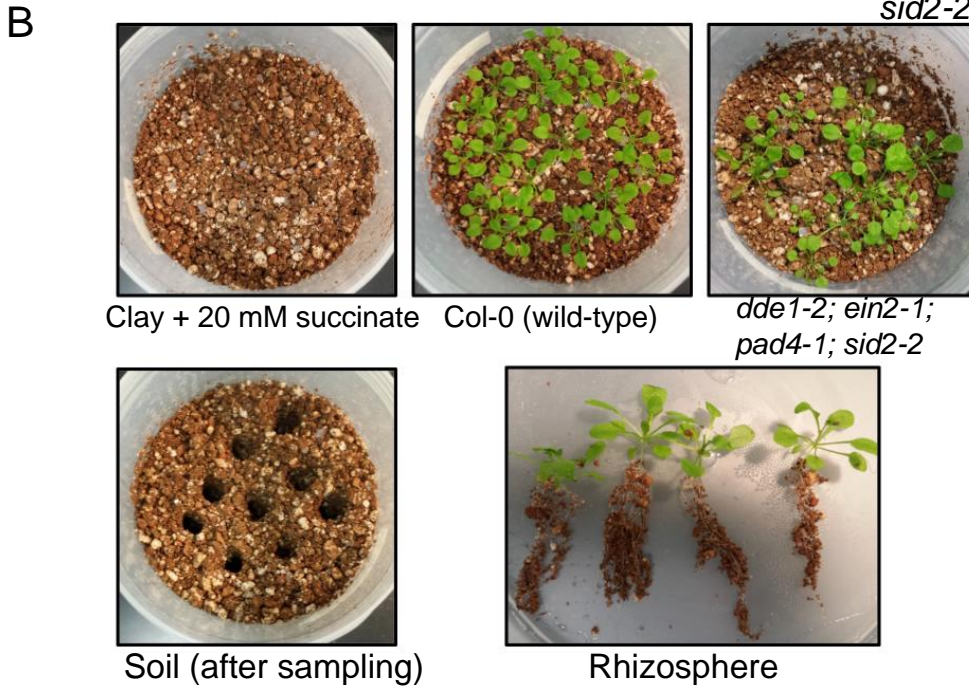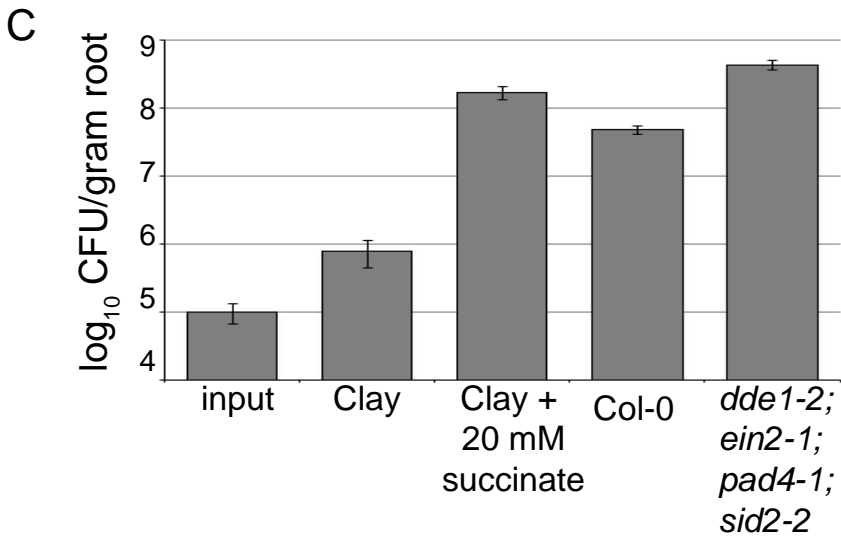

Supplement: mbo005184154sf1.pdf [file mbo005184154sf1.pdf]
