# Supplementary material for: A Genome-Wide Screen Identifies Genes in Rhizosphere-Associated Pseudomonas Required to Evade Plant Defenses
Source: PubMed Central journal article supplement (PMC6222131; doi:10.1128/mbio.00433-18), 2018-11-06
Supplement: mbo005184154sf5.pdf [file mbo005184154sf5.pdf]

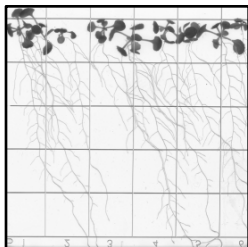

Buffer

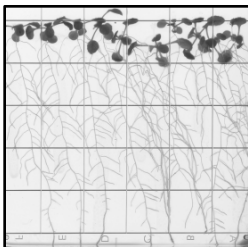

WCS365

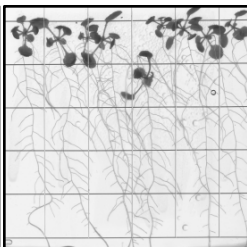

$\Delta wapA$

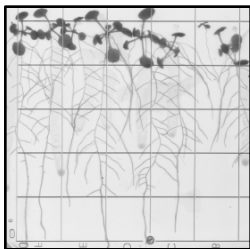

$\Delta cioA$

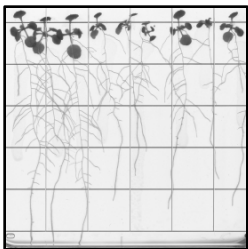

$\Delta gtsB$

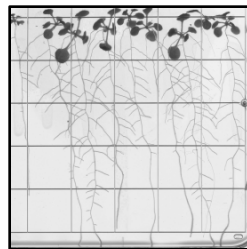

$\Delta morA^{**}$

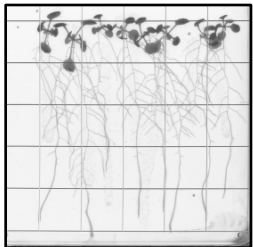

$\Delta puC^{**}$

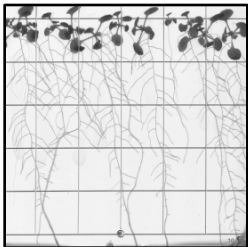

$\Delta uvrA$

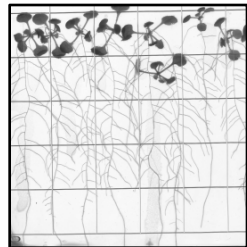

$\Delta katB$
